# Supplementary material for: Porous boron nitride nanofibers enhanced sodium acrylate and acrylamide copolymer hydrogels for effective adsorption of Pb2+
Source: Royal Society of Chemistry journal article supplement (doi:10.1039/d2sm01341j), 2023-01-01
Supplement: d2sm01341j1.pdf [file d2sm01341j1.pdf]

## Supplementary Material

### Porous boron nitride nanofibers enhanced sodium acrylate and acrylamide copolymer hydrogels for effective adsorption of $Pb^{2+}$

Xiangqian Gao,<sup>a,b</sup> Xindi Huang,<sup>a,b</sup> Jing Lin,<sup>\*a,b</sup> Chao Yu,<sup>a,b</sup> Chengchun Tang<sup>a,b</sup> and Yang Huang

<sup>\*a,b</sup>

<sup>a</sup> School of Materials Science and Engineering, Hebei University of Technology, Tianjin 300130, P. R. China

<sup>b</sup> Hebei Key Laboratory of Boron Nitride Micro and Nano Materials, Hebei University of Technology, Tianjin 300130, P. R. China

\* Corresponding author. E-mail: huangyang@hebut.edu.cn (Y.H.) linjing@hebut.edu.cn (J.L.)

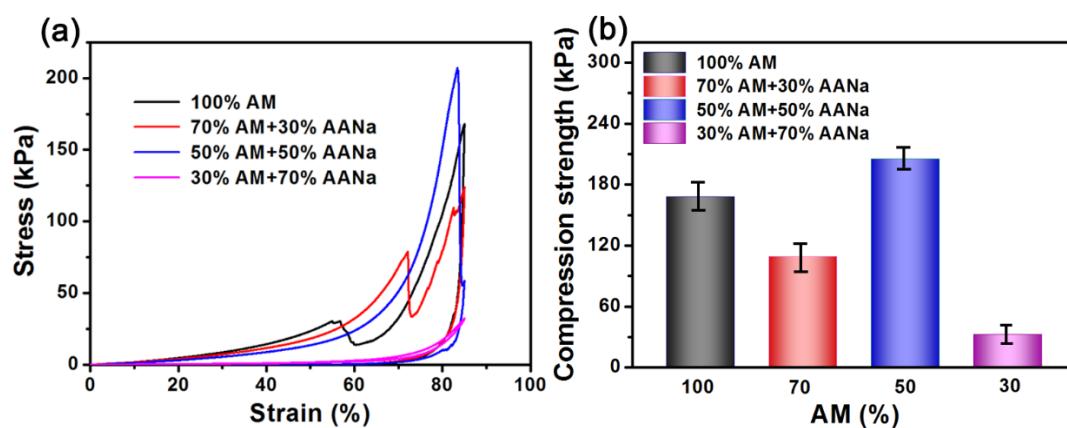

Fig. S1 The compression test of the P(AANa-co-AM) hydrogels (a) the stress-strain curves (b) compression strength.

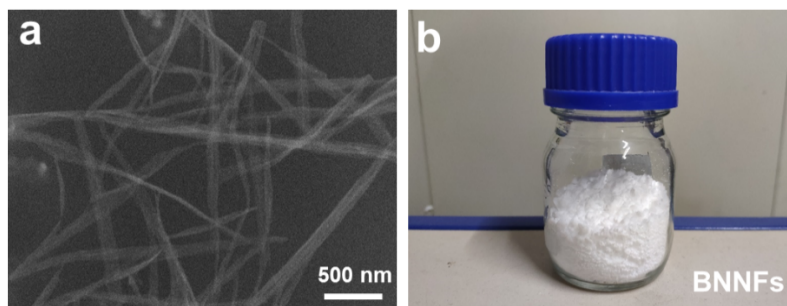

Fig. S2 (a) SEM of BNNFs, (b) optical photograph of a bottle of BNNF powder.

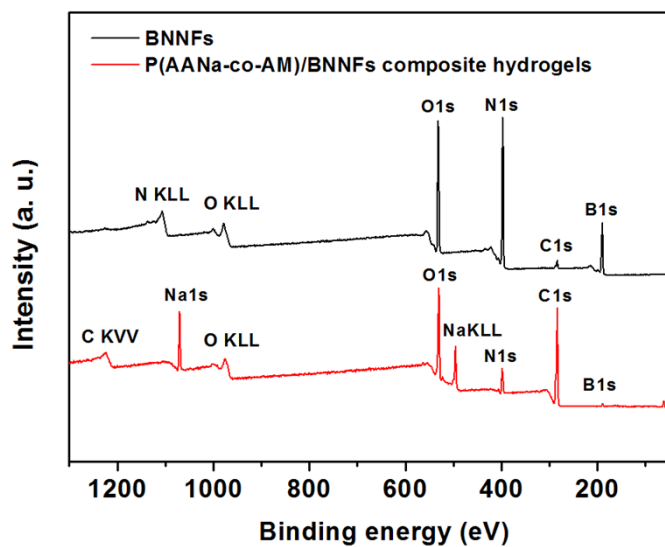

Fig. S3 XPS spectra of the pristine BNNFs and the composite hydrogel with 3 wt% BNNFs.

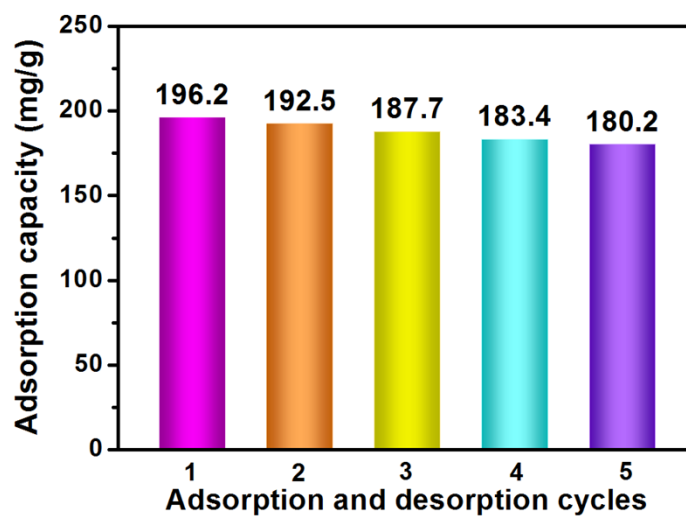

Fig. S4 Effect of recycling times of the P(AANa-co-AM)/BNNFs hydrogels on

equilibrium adsorption capacity of  $Pb^{2+}$  ( $C_0=200$  mg/L, pH 5.0,  $m/v= 1.0$  g/L and contact time 6 h).

**Table S1** Adsorption kinetics models parameters for the  $Pb^{2+}$  adsorption on P(AANa-co-AM)/BNNFs composite hydrogel with 3% of BNNFs at 298 K.

| $Q_e, \text{exp}$<br>(mg/g) | Pseudo-first-order          |                                               |        | Pseudo-second-order         |                                                                |        |
|-----------------------------|-----------------------------|-----------------------------------------------|--------|-----------------------------|----------------------------------------------------------------|--------|
|                             | $Q_e, \text{cal}$<br>(mg/g) | $K_1 \times 10^{-3}$<br>( $\text{min}^{-1}$ ) | $R^2$  | $Q_e, \text{cal}$<br>(mg/g) | $K_2 \times 10^{-3}$<br>( $\text{g mg}^{-1} \text{min}^{-1}$ ) | $R^2$  |
| 180.16                      | 30.965                      | 6.725                                         | 0.9142 | 180.83                      | 0.8457                                                         | 0.9994 |

**Table S2** Adsorption isotherm models parameters of P(AANa-co-AM)/BNNFs hydrogel with 3% of BNNFs at different temperature.

| T (K) | Langmuir     |              |       | Freundlich                                   |     |       |
|-------|--------------|--------------|-------|----------------------------------------------|-----|-------|
|       | $Q_m$ (mg/g) | $K_L$ (L/mg) | $R^2$ | $K_F \text{ mg/g} \cdot (\text{L/mg})^{1/n}$ | n   | $R^2$ |
| 298   | 490.2        | 0.226        | 0.983 | 153.8                                        | 3.4 | 0.855 |
| 308   | 513.8        | 0.231        | 0.987 | 156.9                                        | 3.3 | 0.861 |
| 318   | 541.5        | 0.238        | 0.981 | 161.9                                        | 3.1 | 0.843 |
